# Supplementary material for: Anisotropic charge transfer and gate tuning for p-SnS/n-MoS2 vertical van der Waals diodes
Source: Royal Society of Chemistry journal article supplement (doi:10.1039/d3nr03508e), 2023-01-01
Supplement: d3nr03508e1.pdf [file d3nr03508e1.pdf]

## Supporting Information

### Anisotropic charge transfer and gate tuning for p-SnS/n-MoS<sub>2</sub> vertical van der Waals diodes

Hui Yuan,<sup>a</sup> Ruihan Xu,<sup>a</sup> Jiale Ren,<sup>a</sup> Jieli Yang,<sup>a</sup> Shouyang Wang,<sup>a</sup> Dongwen Tian,<sup>a</sup> Yingshuang Fu,<sup>b</sup> Quan Li,<sup>\*c</sup> Xiaoniu Peng<sup>a</sup> and Xina Wang<sup>\*a</sup>

<sup>a</sup>*School of Physics and Hubei Key Laboratory of Ferro & Piezoelectric Materials and Devices, Hubei University, Wuhan, 430062, China.*

*Email: xnwang2006@hotmail.com*

<sup>b</sup>*School of Physics and Wuhan National High Magnetic Field Center, Huazhong University of Science and Technology, Wuhan, 430074, China.*

<sup>c</sup>*Department of Physics, The Chinese University of Hong Kong, Shatin, Hong Kong, China.*

*Email: liquan@phy.cuhk.edu.hk*
